# Supplementary material
Source: PubMed Central journal article supplement (PMC8636247)
Supplement: 41409_2021_1431_MOESM1_ESM.pdf [file 41409_2021_1431_MOESM1_ESM.pdf]

### **The name list of HSCT team**

Peking University Institute of Hematology  
The First Affiliated Hospital of Soochow University  
Hebei Yanda Lu Daopei Hospital  
Anhui Provincial Hospital  
Beijing Lu Daopei Hospital  
Nanfang Hospital  
Blood Diseases Hospital, Chinese Academy of Medical Sciences  
Xinqiao Hospital Army Medical University (Third Military Medical University)  
Henan Cancer Hospital  
Shanghai General Hospital  
Fujian Medical University Union Hospital  
The First Affiliated Hospital of Zhejiang University School of Medicine  
The First Affiliated Hospital of Guangxi Medical University  
The First Affiliated Hospital of Zhengzhou University  
Shanghai Children's Medical Center  
Nanfang-Chunfu Children's Institute of Hematology & Oncology  
Wuhan Union Hospital  
Aerospace Center Hospital  
Chinese PLA General Hospital  
Zhujiang Hospital of Southern Medical University  
Changhai Hospital  
West China Hospital Sichuan University  
Children's Hospital of Soochow University  
Xiangya Hospital Central South University  
Beijing Jingdu Children's Hospital  
Shenzhen Children's Hospital  
Guangzhou First People's Hospital  
The affiliated Hospital of Guizhou Medical University  
Guangzhou Women and Children's Medical center  
Nanfang Hospital (Department of Pediatrics)  
The First Affiliated Hospital of Xi'an Jiaotong University  
The First Affiliated Hospital of Sun Yat-sen University  
The First Affiliated Hospital of Wenzhou Medical University  
Fifth Medical Center of PLA General Hospital  
Tangdu Hospital  
The First Hospital of Jilin University  
The First Affiliated Hospital of Chongqing Medical University  
The First Affiliated Hospital of Xinjiang Medical University  
Zhejiang Provincial Hospital of TCM  
Beijing Children's Hospital  
PLA 960th Hospital  
The Third Xiangya Hospital of Central South University  
Zhejiang Provincial People's Hospital  
Shandong Provincial Qianfoshan Hospital  
Peking University First Hospital  
The Second Hospital of Hebei Medical University  
Ruijin Hospital Shanghai Jiao Tong University School of Medicine  
Air Force General Hospital, PLA  
Forth Medical Center of PLA General Hospital  
Shanghai Changzheng Hospital  
The Affiliated Hospital of Xuzhou Medical University  
Beijing Hospital

Beijing Cancer Hospital  
PLA Joint Logistic Support Unit NO.920 Hospital  
The First Affiliated Hospital of Harbin Medical University  
Nanjing Drum Tower Hospital, The Affiliated Hospital of Nanjing University Medical School  
West China Second University Hospital, Sichuan University  
General Hospital of Western Theater Command  
Beijing Chao-yang Hospital  
Shandong Provincial Hospital  
The second Hospital of Dalian Medical University  
No. 940 Hospital of the PLA Joint Logistics Support Force  
People's Hospital of Xinjiang Uygur Autonomous Region  
Henan Provincial People's Hospital  
The Affiliated Hospital of Qingdao University  
First People's Hospital of Yunnan Province  
Beijing Friendship Hospital, Capital Medical University  
Ningbo First Hospital  
Guangdong Provincial People's Hospital  
Sun Yat-Sen Memorial Hospital, Sun Yat-Sen University  
Peking University Third Hospital  
The First Hospital Affiliated to Army Medical University  
Yantai Yuhuangding Hospital  
Guangdong Provincial Hospital of Chinese Medicine  
Xinhua Hospital Affiliated to Shanghai Jiao Tong University School of Medicine  
Qilu Hospital of Shandong University  
The Second Affiliated Hospital of Shanxi Medical University  
The First Affiliated Hospital of Xiamen University  
The Third Affiliated Hospital of Sun Yat-Sen University  
Zhongda Hospital Southeast University  
Shengjing Hospital of China Medical University  
The Second Affiliated hospital of Zhejiang University School of Medicine  
Ningbo Yinzhou People's Hospital  
General Hospital of Southern Theater Command  
Seventh Medical Center of PLA General Hospital  
Shenzhen Second People's Hospital  
The First Affiliated Hospital of Anhui Medical University  
General Hospital of Northern Theater Command  
Renji Hospital Affiliated to Shanghai Jiaotong University School of Medicine  
The Sixth Medical Center of PLA General Hospital (Department of Pediatrics)  
Affiliated Hospital of Guangdong Medical University  
The First Affiliated Hospital of Jinan University  
The First Affiliated Hospital of Nanchang University  
The First Affiliated Hospital of Guangzhou Medical University  
Peking University International Hospital  
The First Affiliated Hospital of Henan University of Science and Technology  
Affiliated Hospital of Jining Medical University  
Liaocheng People's Hospital  
Sir Run Run Shaw Hospital, Zhejiang University School of Medicine  
Peking University Shenzhen Hospital  
Hainan General Hospital  
Children's Hospital of Nanjing Medical University  
Shanxi Provincial Cancer Hospital  
North China University of Science and Technology Affiliated Hospital  
Zhongnan Hospital of Wuhan University  
The First Hospital of China Medical University

Qingdao Central Hospital  
Children's Hospital of Shanghai  
The First Affiliated Hospital of Dalian Medical University  
Shunde Hospital of Southern Medical University  
Southernwest Hospital  
Lanzhou University Second Hospital  
Weifang People's Hospital  
The Fourth Affiliated Hospital of Anhui Medical University  
The Fifth Medical Center of PLA General Hospital  
Yijishan Hospital of Wannan Medical College  
Luoyang Central Hospital Affiliated to Zhengzhou University  
Affiliated Hospital of Guilin Medical University  
Shanxi Bethune Hospital  
First Hospital of Shanxi Medical University  
Sun Yat-Sen Hospital affiliated to Sun Yat-Sen University  
The First Affiliated Hospital of Zhejiang University School of Medicine (Department  
Zhangzhou Affiliated Hospital of Fujian Medical University  
PLA Rocket Force Characteristic Medical Center  
Jinhua Hospital of Zhejiang University  
Linyi People's Hospital  
Shandong Provincial Hospital of TCM  
Harbin Institute of Hematology & Oncology  
Jinhua People's Hospital  
The Third People's Hospital of Zhengzhou  
Affiliated Zhongshan Hospital of Dalian University  
Affiliated Hangzhou First People's Hospital, Zhejiang University School of Medicine  
Nanyang Central Hospital  
Shulan Hospital  
Cangzhou Central Hospital  
Central People's Hospital of Zhanjiang  
The Second Hospital of Anhui Medical University  
The Sixth Medical Center of PLA General Hospital (Department of Hematology)  
Tongde Hospital of Zhejiang Province  
The Fifth Affiliated Hospital of Sun Yat-Sen University  
Zhongshan People's Hospital  
Ningbo Yinzhou No. 2 Hospital  
Linyi Central Hospital  
Heping Hospital Affiliated to Changzhi Medical College  
The Second People's Hospital of Linyi  
Jiangxi Provincial People's Hospital  
People's Hospital of Rizhao  
Changzhi People's Hospital  
Xi'an Gaoxin Hospital



chool

of Hematology)
